# Supplementary material
Source: MDPI journal article supplement (https://www.mdpi.com/2073-4395/13/11/2810)
Supplement: s1 [file s1]

# **Soybean LEAFY COTYLEDON 1: A Key Target for Genetic Enhancement of Oil Biosynthesis**

**Sehrish Manan<sup>1, 2,\*</sup>, Khulood Fahad Alabbosh<sup>3</sup>, Abeer Al-Andal<sup>4</sup>, Waqas Ahmad<sup>5</sup>, Khalid Ali Khan<sup>6</sup>, and Jian Zhao<sup>2,7,\*</sup>**

<sup>1</sup> Biofuels Institute, School of the Environment and Safety Engineering, Jiangsu University, Zhenjiang 212013, China

<sup>2</sup> National Key Laboratory of Crop Genetic Improvement, Huazhong Agricultural University, Wuhan 430070, China

<sup>3</sup> Department of Biology, College of Science, University of Hail, Hail, Saudi Arabia

<sup>4</sup> Biology Department, College of Sciences, King Khalid University, Abha 61421, Saudi Arabia

<sup>5</sup> College of Biology and the Environment, Nanjing Forestry University, Nanjing, China

<sup>6</sup> Applied College, Mahala Campus and the Unit of Bee Research and Honey Production/Research Center for Advanced Materials Science (RCAMS), King Khalid University, Abha 61413, Saudi Arabia

<sup>7</sup> Department of Horticulture, Hunan Agricultural University, Changsha, China

\* Correspondence: sehrish\_manan@ujs.edu.cn (SM); jianzha@huau.edu.cn (JZ)

## Glyma.17G005600 Gene-level FPKM values

**Coefficient of variance:** 2.61246520544678  
(across samples below)

|              |         |             |
|--------------|---------|-------------|
| Pod :        | 19.483  | <div></div> |
| Root Hairs : | 0.018   |             |
| Leaves :     | 0.068   |             |
| Root :       | 0.000   |             |
| Nodules :    | 0.000   |             |
| Seed :       | 142.834 | <div></div> |
| Sam :        | 0.000   |             |
| Stem :       | 0.000   |             |
| Flower :     | 0.283   |             |

**Supplementary Fig. S1.** Predicted tissue specific expression of GmLEC1 retrieved from Phytozome

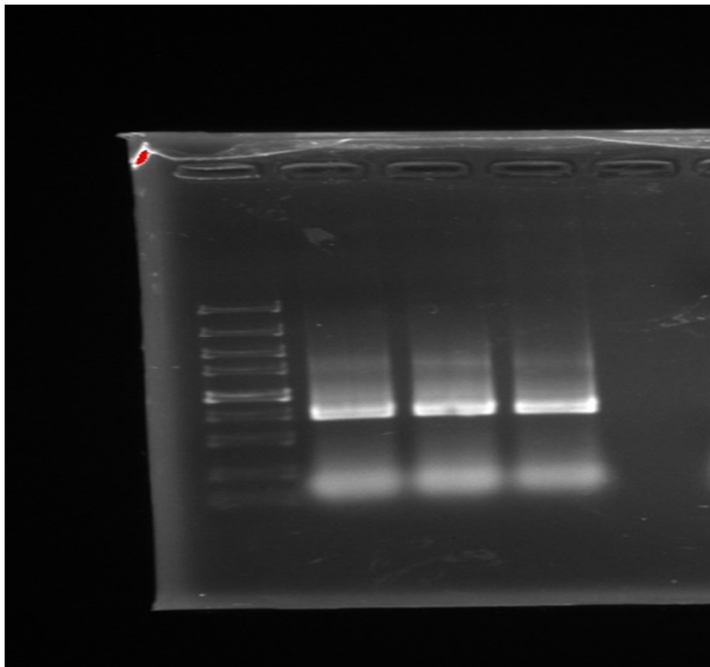

**Supplementary Fig. S2.** PCR amplification of GmLEC1 using seed cDNA.

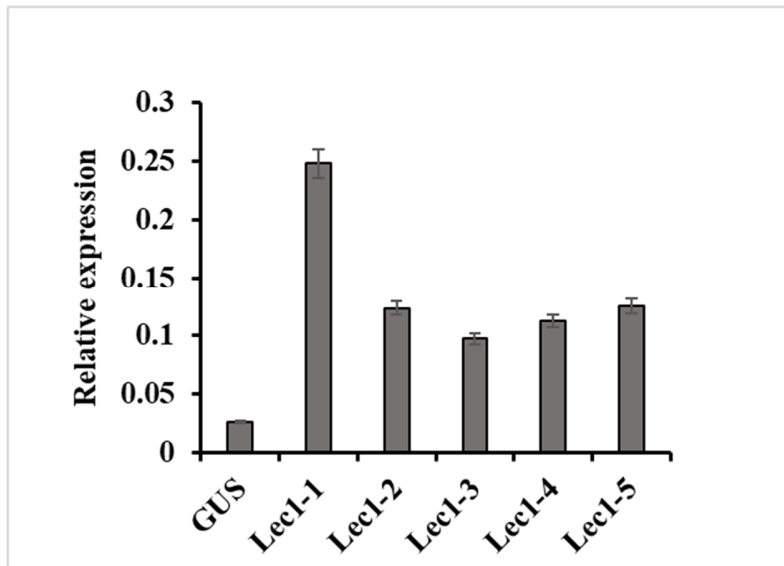

**Supplementary Fig. S3. Expression of GmLEC1 in representative transgenic soybean hairy roots**

**Supplementary Data S1. Amino acid sequences and GenBank Id of proteins used to build phylogenetic tree**

>**AtLEC1** (GenBank ID: Q9SFD8.2)

MERGAPFSHYQLPKSISELNLDQHSSNNPTPMTSSVVVAGAGDKNNGIVVQQQPPCVARE  
QDQYMPIANVIRIMRKTLPSHAKISDDAKETIQECVSEYISFVTGEANERCQREQRKTITA  
EDILWAMSKLGFDDNYVDPLTVFINRYREIETDRGSALRGEPPSLRQTYGGNGIGFHGPSH  
GLPPPYPYGYGMLDQSMVMGGGRYYQNGSSGQDESSVGGGSSSSINGMPAFDHYGQY  
K

>**ZmLEC1** (GenBank ID: NP\_001105518.1)

MDSSSFLPAAGAENGSAAGGANNGGAAQQHAAPAIREQDRLMPIANVIRIMRRVLP  
AHAKISDDAKETIQECVSEYISFITGEANERCQREQRKTITAEDVLWAMSRLGFDDYVEPLG  
AYLHRYREFEGDARGVGLVPGAAPSRGGDHHPHSMSPAAMLKSRGPVSGAAMLPHHH  
HHHDMQMHAAMYGGTAVPPPAGPPHHGGFLMPHPQGSSHYLPYAYEPTYGGEHAMA  
AAYYGGAAYAPGNNGSGDGS GSGGGGGSASHTPQGS GGLEHPPHFPAYK

>**BnLEC1** (GenBank ID: ACB12186.1)

MERGAPLSHYQLPKSNSGLNLDQHNNSIPTMTGSIGACDDKNKTILPQQQPSMPREQDQ  
YMPIANVIRIMRKILPPHAKISDDAKETIQECVSEYISFVTGEANERCQREQRKTITAEDIL  
WAMSKLGFDDYVGPLNVFINRYREFETDRGCSLRGESSFKPVYGGSGMGFHHGPPPPGSY  
GYGMLDQSMVMGGGRYYHNGSGPDGSVGGGGGSSSSMNGMPVNYDQYGQYK

>**PcLEC1** (GenBank ID: ADR10435.1)

MMSEVGSPTSQDSRNSDGERENCAVREQDRFMPIANVIRIMRKVLP  
THAKISDDAKETIQECVSEYISFITSEANDRCQKEQRTITAEDVLWAMSKLGFDDYVEPLTIYLQKYRDAE  
GDHRGSIRGEPLPKKEMSGLANLSAGFQMGPPLYGTSGMGYYKDSITGSNINYDPY  
AQYK

**>Glyma.07G268100.1**

METGGFHGYRKLPNTTSGLKLSVSDMNMNMRQQQVASSDQNCNHSAAAGEENECTVR  
EQDRFMPIANVIRIMRKILPPHAKISDDAKETIQECVSEYISFITGEANERCQREQRKTITA  
EDVLWAMSKLGFDDYIEPLTMYLHRYRELEGDRTSMRGEPLGKRTVEYATLATAFVPP  
PFHHHNGYFGAAMPMTYVRETPPNAASSHHHHHGISNAHEPNARSI\*

**>Glyma.17G005600.1**

METGGFHGYRKLPNTTAGLKLSVSDMNMNMRQQVASSDHSAAATGEENECTVREQDRFMPI  
ANVIRIMRKILPPHAKISDDAKETIQECVSEYISFITGEANERCQREQRKTITAEDVLWAM  
SKLGFDDYIEPLTMYLHRYRELEGDRTSMRGEPLGKRTVEYATLGVATAFVPPPYHHH  
NGYFGAAMPMTYVREAPPNTASSHHHHHHHHHHHARGISNAHEPNARSI\*

**>Glyma.10G192000.1**

MSDAPASPSHESGGEQSPRGSLSGAAREQDRYLPIANISRIMKKALPPNGKIAKDAKDTM  
QECVSEFISFITSEASEKCQKEKRKTINGDDLWAMATLGFEDYIEPLKVYLARYREAEG  
DTKGSARS GDGSARPDQVGLAGQNAQLVHQGSLNYIGLQVQPQHLVMPSMQGHE\*

**Supplementary Table S1. List of primers used in this study**

| <b>Gene</b>   | <b>Primer Sequence (5' to 3')</b>                        |
|---------------|----------------------------------------------------------|
| GmLEC1-F      | ATGGAAACTGGAGGCTTTCAC                                    |
| GmLEC1-R      | TTATATGGAGCGAGCATTTGGT                                   |
| pDON-GmLEC1-F | GGGACAAGTTTgtacaaaaaagcaggctTCATGGAAACTGGAGGCT<br>TTCAC  |
| pDON-GmLEC1-R | GGGGACCACTTTGTACAAGaaagctgggtATTATATGGAGCGA<br>GCATTTGGT |
| GmLEC1-qRT-F  | ATGGAAACTGGAGGCTTTCACGG                                  |
| GmLEC1-qRT-R  | GTAGTCTAGTGTCACGTCGGTGT                                  |
| GmActin-qRT-F | CTTCCCTCAGCACCTTCCAA                                     |
| GmActin-qRT-R | GGTCCAGCTTTCACACTCCAT                                    |
| 18s univ-F    | CTATCAACTTTCGATGGTAGG                                    |
| 18s univ-R    | CCGTGTCAGG ATTGGGTAATTT                                  |

## Supplementary data S2. The coding DNA sequences of genes used to perform qRT-PCR

### GmLEC2/ Leafy cotyledon 2

>Glyma.20G035800.1 CDS

```
ATGGAAAACCTTTTTTGTGCCATTTTTAAAAAAAACCCCAACCCATCAATCACCCTACTGGTG
GCAATGGCTCATCTTCATCAAACCAAACAAGCCTTGTACAACCAAGCACATATCCTCAAAATTT
CCCTTACAATACTAGTGTAAAACCTTAACCTTCCAGAACAACCTTATTTTATTTCCTTTGTATCCC
TTTCCAACAGGACAAGTTAGCTTTTCTAATCAACCCTATGGAATGCCAAATTCGGAACCTTCAAG
GTTTCGAGGGCATGCATGACCAGCTACAAGGGAGAGATGGAGACAAGTAAGACAAGGAGTAA
AAATTCTACTCTTGTGCTCCTAATTCAGTTCTAGAAAGGACAACAAGAGAACAATTTGTTTCCT
AATGGAGGGTCAAATGTGAGGATCACAGTCAAACAACACAATGCAACCAAGTTTTTTTAACACCC
CAAACGGGAAGAAGCTAGAAGAAATTTTGACAAAGAAGTTGAATAATAGTGATGTTGGCGTCCT
AGGCCGCATTGTGCTCCCAAAGAGAGAGGGCTGAGGATAAGCTTCCGACACTGTGGAAGAAGGAA
GGAATCAATATTGTACTAAAGGATGTATATTCTGAGATTGAATGGAGCATCAAATACAAGTACT
GGACTAATAACAAAAGCAGAAATGTATATTCTTGATAATACAGGGGATTTTGTTAACCATTTATAA
ACTTCAAACAGGAGATTTTATAACCTTTTACAAGGACGAGTTGAAAAATCTGTATGTGTCGGCT
CGAAAGGATCAAGAAAATCTAGAAGAATCTAAGTCCTCGTCAAACACAGGAATGTCACATGAAC
CAGATGCATATTTAGCTTACTTGACGAAGGAACCTTAGCCATAAGGGGAAAGCAGAAGCTGCCAA
CAACCTTTTGAACAATGTTGAGGAAGAGGCACCAAATCAAGCAAATCAATTACATCAATTCATG
CCGATGAACAATATTGTTGGGGAGGGGGCATCAAACCAAGCAATTCAAGAAGCCGCACCAGCCG
CACCCGTCAATGTTAATCAAGAAAACAAAGTTGTTGACGACGATGATGATGATATCTATGGTGG
CCTTGACAATATTTTCGAAATTGGAAATACTTATCAAATTTGGTAG
```

### GmABI3/ Absciscic acid insensitive 3

>Glyma18g38490.2 CDS

```
ATGGAAAACGAACACACTTTGGCGGTTGCTGAGAGAGAGATGTGGCTGAACAGTGACCAAGACG
AGTTCCTAGGAGTCAATGATGCTTCCATGTTCTACGCCGATTTCCCTCCTCTCCCTGATTTCCC
TTGCATGTCATCATCATCTTCTTCTTCAGCACTACCATTTCTGTGAAGACCATGACATGT
TCCACCAGAACCACAACAACAACCACCACTTCTCTTCTTCTCTCTCTCATCCTGGGCCGTGT
TGAAGTCAGATGCTGAGGAAGATGCAGAGAAAAATCATTGCAACCGCTACATGCATGACCAACT
TGATGCAACTTTGTCTTCCACTGCTTCCATGGAGGTTTCTCAACAGAAAAACCTCGATCCTGGG
CTTGGTGGCCCTGTTGGTGAGTGCATGGATGATGTTATGGACACTTTTGGGTACATGGAGCTTT
TGGAGGCCAATGATTTCTTCGACCCTGCCTCTATCTTTTCAAGACGAGGATAACGAAAACCTTT
AGTAGATTTTCGGCACACTGGAGCAGCATGTGCCGTTGCATGATGAGCAACATGAAATGTTGCAT
CATCAGCAAGGGAGAACAAGAAGAGGTTGATCATCAGGTTCTGTGTGTGAAGAGATCCAAGGAG
ATGAAGAAGGTGGTGATGGTGTTGGAGTAGACGATGAGATGAGTAATGTGTTCTTGAGTGCGT
CAAGTCTAACAAGGATAGTGTCTCTGCTAATGATTTGAGGAATGTGAAGCTCAAGAAGGCGACG
ATTGAAAGTGCTGCGAGGCGGCTAGGGGGAGGAAAAGAAGCCATGAAGCAGTTGCTGAAGCTGA
TTCTTGAGTGGGTTCAAACCAGCCATCTTCAGAATAAGCGGCGTAAGGAGAATAACGGTAGCAG
TATTAGCAGTGCATTCAGGCACAGTTTCCGGATCCTAGTGTCCAGAACAACCAGAATACACAA
AGTGGTTTCATTTTACCTGAATCAAACGCTTGTTTCAACAACCAGACACCGTGTTGAGTCCTC
AACTTTTTGCAACAGATCAGGCTCCTCTCATGGTGCCTCCACAGCAATTTCAACAACCCATGGT
TGGGTATGTGGGTGACCCTTACACTAGTGGTGCTGCTTCAAATAACATCACAACCTTCTCATAAT
CATAACAGCAACAACCCCTATCAACCTGGTGCAGAACAATATCACATGTTGGAGTCGGCACATT
CATGGCCTCATTTCTCAGTTCAATGTTGCTTGTCACTATAGCCAGTCTTTTGGGGACAATAATGG
TATTTTCCCACATGGGGGTTTTTGGTGGTGGCTATGGCAATAACCAGTACCCTTACCAGTTTTTT
CATGGCCCTGGTGATACGTTGATGAGGTTGGGGCCCTCGGCGACGAAGGAAGCGAGGAAGAAGA
```

GAATGGCGAGGCAGAGAAGGTTTCTGTCTCATCACAGGCATCATAATGGTAATTACCAGAATTC  
 AGGGTCAGACCCACATGCAAGATTGGGGGGTGGTGATAATTGCACCACTGGTTTGGCTGCACCT  
 CATCATGCAAATCCTACAGCCAATTGGATGTACTGGCAGGCTATGACGGGCGGTGCGGCGGGTC  
 CTTTGGCTCCCCCGGCCGAGCCGCCAGCTGTGGACCGGTCTGCCTTGCAGACACAGAATTGTCA  
 TCAGAGTCGAGTTGCATCAGATAGGAGACAGGGTTGGAAGCCTGAGAAAACTTGAGGTTCCCTT  
 CTGCAGAAGGTGTTGAAACAAAGCGATGTGGGAAGTTTGGGGAGAATAGTTTTGCCAAAAAAG  
 AGGCAGAAACCCATTTGCCAGAGCTGGAGGCAAGAGATGGAATTTCCATAACAATGGAAGACAT  
 TGGAAC TTCACGTGTTTGGAACATGCGCTATAGATACTGGCCGAACAACAAAAGCAGAATGTAT  
 TTGCTCGAGAACACTGGTGACTTTGTGAGAGCCAATGGACTCCAAGAGGGAGATTTTCATAGTGA  
 TATACTCAGATGTGAAGTGTGGCAAATATATGATAAGAGGAGTGAAAGTGAGGCAACAAGGTGT  
 GAAACCAGAGACCAAGAAAGTAGGAAAATCGCAGAAAAACCAGCATGGGACAGGGACAAATGCA  
 TCAACTACAGCTTGCTACTGCTGCTAATAATGGCACGCCATCGTCACCGAAAACCAAAGCTGAAA  
 AAAGTAGTAAATTAATATAA

### GmTT2/Transparent Testa 2

>Glyma.17G050500.1 CDS

ATGGGGAGAAGCCCTTGTTGTTCAAAGGAGGGTTTGAATAGAGGTGCTTGGACAGCTCATGAAG  
 ACAAATCCTGAGAGAATATATTAGAGTCCATGGTGAAGGAAGATGGAGAAACCTTCCCAAAG  
 AGCAGGTTTGAAGAGATGCGGGAAAAGTTGTAGACTTCGATGGTTGAATTATCTCAGACCAGAT  
 ATTAAGAGAGGCAATATATCCCCAGATGAAGAAGAGCTCATCATCAGGCTCCACAAGCTCCTCG  
 GAAACAGATGGTCTTTAATAGCTGGGAGGCTTCCAGGACGAACAGACAACGAAATAAAGAATTA  
 TTGGAACACCAATTTAGGGAAAAAGGTGAAAGATGGTCACCAAACAACCACTGGAAACAACACA  
 CAGAATCCAATGCCCAACCCATCACCCCTCCCTATCTCCTCCTAAACTAGATTCCCATGTTGTCC  
 GTACAAAGGCTACCAAGTGCTCCAAGTTGTTATTCCTAAACCCACCCCTCACCCATCAATGCA  
 GAACAAGTTCAAGACTGAGGCAGAAGAAGAAGAAGAAGCAAGGCTTGTGAATGGTGTAAAT  
 AGAAACCAAATGGAACACACTACATACGACAACGGGTTCTGTGCTTTCCGGATGAAGAAAAAG  
 AACTCTCAACAGATTTGCTCATAGATTTCAACGTGGGGGATTTCTGCTTGTCTGATCTTCTCAA  
 CTCAGATTTCTCAAACCTCGTACAATTTCAAGCTGCAATATTAATAATGTTAACAACCACGAGCAG  
 TTATCGCCTTGTTTCGGACCAACCTGATCCTATGTTCTCTGATGAAGTTCTCAAGGACTGGACAC  
 ACAACAATTTTGCAGACGAAGCGAATGCTTCCAACAATCTTCGTTCTTTCATTTTCGTTCCCTTGA  
 GTCCACTGAGGAAAGATTAGGAGAATGA

### GmMUM4/Mucilage Modified 4

>Glyma.10G102400.1 CDS

ATGGCGCAGAGTAATTGGGAAGCAGATAAGATGCTTGATGTTTATATTTATGATTATTTGGTGA  
 AGAAAAAGTTGCACAACACTGCTAAAGCATTCATGACAGAAGGGAAGGTTTCTCCTGATCCAGT  
 AGCAATTGATGCTCCTGGAGGTTTTCTTTTTGAGTGGTGGTCTGTTTTCTGGGATATTTTCATT  
 GCGAGGACAAATGAGAAACATTCTGAGACTGCTGCAGCATATTTAGAGGCACAACAGATTAAAG  
 CGAAAGAACAACAGCAACTGCAAATGCAGCAGTTGCAATTAATGCGTCAAGCTCAAATGCAAAG  
 GAGGGATTCTAATCATCCTCCCCTTGGAGGTCTGTAAATGCTATCACTACAGAAGGAGTGCTT  
 GGGCAATCTACTGCCAGTGCTTTGGCCGCAAAAATGTATGAGGAGCGGATGAAGCACTCTAACC  
 CCATGGATACAGAGACATCCCAACCACTTTTAGATGCTAGAATGGCTCTTTTGAAATCAACAAA  
 TCATCCTGGTCAGATGGTTCAAGGAAATTCAGGAAGTGTGACGGCAGCTTTGCAGCAAATCCAG  
 ACTCGAACTCAGCAAACACCTCAGGATATCAAACCTGAAGTCAACATGGGTACCATGCAGAGAT  
 CCTTGCCTATGGATCCTTCATCAATTTATGGGCAGGGAGGAATGCAGTCTAAGCCTGGAATTGT  
 AAATGCAGGATTGAATCCGGGAGTTGGTAGTCTCACATTGAAAGGATGGCCTTTAACTGGCATT  
 GATCAAATTCGTCCTGGTTTTGGAGCACCAGTTCAGAAGCCTCTCCTTCAGAGTGCAAATCAGT

TTCAGCTTTTGCCACAGCAACAACAACAGCTCCTCGCACAGGTTTCAGGCACAAGGAAATAT  
 TGGCAATTCACCAGTTTATGGAGATATGGATCCACAACGGTTAAGGGGATTAGCTAGGGGAAGT  
 TTGAATGCTAAAGACGGTCAATCAATTGCAAATGATGGATCAATAGGCTCTCCAATGCAATCTA  
 CTTTCATCTAAGATCAACATGCCACAGATCCAACAATCCACCTCCCATCAACAACAGGATCCTTT  
 GCATCCACAACAATTGGTGCAGAATAACCGGAAAAGGAAGGGGCCTACATCTTCAGGACCGGCC  
 AACAGTACTGGTACCGGAAATACACTTGGCCCTTCTAATTCTCAGCCATCAACTCCATCAACTC  
 ATACTCCTGGTGATGGAGTTGCTATGGCGGGTAACTTGCAGAATGTTGCTGGTATATCCAAAGG  
 TTTGATCATGTATGGTACTGATGGAGTGGGCGGTCTTGCATCTTCGACAAATCAGCTGTTGCAG  
 GATGACATGGAACATTTTGGAGATGTTGGCTCCTTAGAGGATAATGTGGAATCATTTCTCTCAC  
 AGGATGATGGTGGTGAAGGGACTTGTTTGGCACATTGAAACGGAACCCCTTCTGAGCATGCTAC  
 GGATGCTTCAAAGGCTTTTTCCTTCAGTGAAGTTGGTTCTATACGCAAAAGCAACAGCAAAGTT  
 GTTTGCTGTCATTTCTCTTCAGATGGGAAATTATTAGCTAGTGCTGGACATGACAAGAAGGTTG  
 TTCTGTGGAATATGGAGACATTGCAAACAGAAAGCACTCCGGAGGAACACAGTCTTATTATTAC  
 TGATGTTTCGCTTCAGACCAAATTCAACTCAGCTGGCAACATCTTCATTTGATACAACGTGTCGG  
 CTGTGGGATGCTGCAGATCCAACCTTCCCTTTACATACATATAGTGGTCATACTTCACATGTGG  
 TGTCCCTTGATTTCCACCCAAAGAAAACCTGAACTTTTCTGTTCTTGTGACAATAACAATGAGAT  
 TCGCTTCTGGAGTATTAGTCAATATTCTTCCACTCGTGTTTTTAAGGGAGGATCTACACAGGTG  
 AGGTTTCAGCCAAGGCTTGGTCACCTTCTGGCCGCAGCAAGTGGCAGTGTTGTGTCTCTCTTTG  
 ATGTTGAGACTGACAGGCAGATGCACACGTTACAGGGACACTCTGCCGAGGTACACTGTGTCTG  
 TTGGGATACAAATGGAGATTACTTAGCATCTGTGAGTCAAGAATCTGTCAAAGTGTGGTCACTT  
 GCCTCTGGGGAGTGCATTTCATGAACCTTAATTCTAGTGGAACATGTTTCATTCTTGTGTTTTTC  
 ACCCTAGCTACTCCACTCTTTTGGTTATTGGAGGATACCAGTCATTGGAACATATGGAACATGGC  
 TGAGAATAAATGTATGACAATTCCAGCTCACGAGTGTGTGATATCTGCTCTAGCACAGTCACCA  
 CTTACAGGAATGGTTGCTTCGGCCAGTCATGACAAATCTGTAAAGATTTGGAAATAG

## GmGL2/ Glabra 2

>Glyma.07G019500.1 CDS

ATGGGAGTCAACATGTCCAACACACCACCTCACACCAAAGACTTGTTTTCTCTTCATCTCTCT  
 CTCTTAGCTTAGCTGGGATTTTCCGGCATGCTGGGGAGGCGGCGGAGACGTCCGGCATGGAGGT  
 GGCAGGCGGCAATGAGGTCCGGCGAGAGGACACTGTTGAGATTAGCAGCGACAACTCAGGACCC  
 GTGAGATCCAGGTCAGAAGAAGATTTTGATGGTGAAGGTCTTCATGAGGATGACGACGACGGCG  
 ATGACAAGAACAGAAAGAAGAAGAAGAGGAAGTATCACAGGCACACCGCTGAACAGATCAGAGA  
 AATGGAAGCGCTTTTCAAGGAATCACCGCATCCTGATGAAAAGCAGAGGCAACAACCTCAGCAAC  
 CAACTTGGCCTTGCTCCAAGGCAAGTTAAGTTTTGGTTCCAAAATCGTCGAACCCAAATCAAGG  
 CAATACAAGAGCGCCATGAAAATTCATTGTTGAAGACAGAATTAGACAGACTTAGGGAGGAAAA  
 TAAGGCCATGAGAGAGACCATAAACAAATCTTGTTGCCCAATTGTGGCATGGTAACGGCTACC  
 ATAGATGCTTCCATGTCCACTGAAGAAAAACAACCTTCTTATTGAAAATGCCAACTCAAAGCCG  
 AGGTAGAGAAGCTCCGAACAGCTTTAGGGAAATTCTCACCAAGAACAACGTCTCCTACTACATC  
 TTCTGCTGGCCATCATGATGAGGAAGAGAATAGAAGCTCTTTGGATTTTACAATGGAATTTTC  
 GGGCTCGACAAATCAAGGATAATGGATATAGCAAACCGAGCAACGGAGGAGCTCATAAAGATGG  
 CAAATATGGGGGAACCCCTTATGGGTTCGTAGCGTTGAAACAGGTCGTGATATACTTAACCTACGA  
 TGAATATGTGAAGGAGTTCGAAGTTGAAAATTCTGGTAGTGAAAGGCCAAAGACATTCATCGAA  
 GCCTCAAGAGAACTGAGGTTGTTTTTATGGATCTTCCTCGGCTTCTCCAAAGTTTCTAGACG  
 TGAATCAATGGAAGGAAATGTTTCCATGCTTAATATCAAAGGCTGCAACTGTTGATGTTATATG  
 CAATGGGGAAGGTTCTAACAGGAATGGTGCAGTGCAATTGATGTTTGCTGAGCTTCAAATGCTC  
 ACTCCAATGGTGGCCACCAGAGAAGTGTATTTTCGTGAGGTGCGGCAAACAGTTAAGTGATGAAC  
 AGTGGGCTATAGTTGATGTCTCCATAGACAAAGTAGAAGACAACATTGACGCATCCCTTGTGAA



ATGCAGAAAACGCCCATCTGGTTGTATTATTGAGGATAAGTCAAATGGCCATTGCAAGGTGATA  
TGGGTGGAGCACTTGGAGTGCCAAAAGAGCACAAATTCATACAATGTATCGAACCATTGTCAATA  
GTGGTCTAGCTTTTGGGGCAAGGCATTGGATAGAAACACTACAACCTCAATGTGAACGTTTGGT  
TTTTTACATGGCAACGAATGTTCCAATGAAGGATTCAACTGGTGTGCGACGTTGGCTGGGAGG  
AAGAGCATATTGAAGTTGGCACAAGAATGACATGGAGTTTCTGCCATGCAGTTGGTGCATCAA  
GTTTCCATACATGGACCAAGGTCACAAGTAAACAGGAGAAGACATAAGGATTAGCTCTAGGAA  
GAACTTGAATGAGCCTGGTGAACCTCTTGGGGTTATCTTGTGTGCCGTTTCTTCTGTGTGGCTT  
CCTGTCTCTCCTAATGTGCTGTTTGATTTCTTGAGGGATGAAGCTCGTCGAAATGAGTGGGATA  
TCATGTCCAGTGGTGGGTGAGTGCAGTCCATTGCAAATTTAGCTAAAGGAAAAGACCGAGGCAA  
TGTTGTAAACATCCAAAATAATACAATCAAAAGATAACAGTGTGTGGATATTGCAAGATAGC  
TGCACAAGTGCTTATGAGTCAACGGTGGTATATGCTCCTGTGGAATTTGCTGGTATACAATCTG  
TGCTGACAGGATGTGATTCAAGTAATCTTGCAATATTGCCGTCAGGATTTTCAATCTTCTCTGA  
TGGGATTGAGGGAAGGCCATTGGTAATTACGTCAAGGCAAGAAGAAAAATACACTGAAGGAGGC  
TCTTTGTTTACAATGGCATTCCAGATCCTTGCCAATCCTTCTCCAACAACCAAGTTAACAATGG  
AGTCTGTGGAATCGGTCAATAATCTTGTGTCTTGTACATTAAGAAATATTAGAACAAGTTTGCA  
GTGTGAAGATGGTTAG

## **BCCP2/ BIOTIN CARBOXYL CARRIER PROTEIN 2**

>Glyma.13G057400.1 CDS

ATGGCCTCTTTCTCGGTCCCATGCCCAAGTGTCTTCACTTCTTCTCTCCCCCTTTGGGGT  
TGAAATCTCTAAATGTTTCATTTCAAAGGGTGTGAGCTTGAAGCCTTCTCTTTCATTCGGATC  
TTTGTCTGCTGAATCTGCTGCATCAAGGATTCAGTGCCTTAACAGGAAGCAATTTTCTGTTCTG  
AAGGCTACTAAAGTTGAAAATTCCAATCTGCCCTGTAAATGGTCAATGGACCTAATGTTGCTT  
CATCGAAAGAAAAAGAAGTGCATAATGGAAAACCTCTCTGGTGGTACTATCCCAGATGATGCTTC  
AATTATTGCATTCATGTCTCAAGTTTCAGACCTTGTAATACTCGTGGATTCGAGAGATATTGTG  
GAACTTCAACTTAAGCAATCAGACTGTGAGCTCATGATAAGAAAAAAGAAGCATTGCAGCCTC  
CACCAGTTATAGCCCCAACATCCCCACCAATGCACTATGCCACAGTTTCTTCTCCGCCACCACC  
ACCAGCAGCTGCTCCTGCTAGCTCTGCACCTCCAAAAGCAGTTCTTGCCTTGCCTTCCCCTGCA  
AAAGCAGGCACATCTTCTCACCCAACGCTGAAATGTCCGATGGCAGGAACCTTCTACAGGAGTC  
CAGCACCTGGTGAACCTGCATTTGTCAAGGTGGGAGATAAAGTGCAGAAAGGCCAGGTTATTTG  
CATTATCGAGGCTATGAACTGATGAATGAAATTGAGGCTGATCAGTCAGGAACAATAGCTGAG  
GTATTAGCTGAGGATGGGAAACCAGTCAGTGTGGACACGCCTCTTTTTTGTAAATAGTTCCATGA

## **WRI1/ WRINKLED 1**

>Glyma.15G221600.1 CDS

ATGAAGAGGTCTCCAGCATCTTCTTGTTCATCATCTACTTCCTCTGTTGGGTTTGAAGCTCCCA  
TTGAAAAAAGAAGGCCCTAAGCATCCAAGGAGGAATAATTTGAAGTCACAAAAATGCAAGCAGAA  
CCAAACCACCACTGGTGGCAGAAGAAGCTCTATCTATAGAGGAGTTACAAGGCATAGGTGGACA  
GGGAGGTTTGAAGCTCACCTATGGGATAAGAGCTCTTGGAACAACATTCAGAGCAAGAAGGGTC  
GACAAGTTTATTTGGGGGCATATGATACTGAAGAATCTGCAGCCCGTACCTATGACCTTGCAGC  
CCTTAAATACTGGGGAAAAGATGCAACCCTGAATTTCCCGATAGAACTTATACCAAGGAGCTC  
GAGGAAATGGACAAGGTTTCAAGAGAAGAATATTTGGCTTCTTTGCGGCGCCAAAGCAGTGGCT  
TTTCTAGAGGCCTGTCTAAGTACCGTGGGGTTGCTAGGCATCATCATAATGGTCGCTGGGAAGC  
ACGAATTGGAAGAGTATGCGGAACAAGTACCTCTACTTGGGGACATATAAACTCAAGAGGAG  
GCAGCAGTGGCATATGACATGGCAGCAATAGAGTACCGTGGAGTCAATGCAGTGACCAATTTTG  
ACATAAGCAACTACATGGACAAAATAAAGAAGAAAAATGACCAAACCAACAACAACAAACAGA  
AGCACAAACGGAAACAGTTCCTAACTCCTCTGACTCTGAAGAAGTAGAAGTAGAACAACAGACA

ACAACAATAACCACACCACCCCATCTGAAAATCTGCACATGCCACCACAGCAGCACCAAGTTC  
AATACACCCCATGTCTCTCCAAGGGAAGAAGAATCATCATCACTGATCACAATTATGGACCA  
TGTGCTTGAGCAGGATCTGCCATGGAGCTTCATGTACACTGGCTTGTCTCAGTTTCAAGATCCA  
AACTTGGCTTTCTGCAAAGGTGATGATGACTTGGTGGGCATGTTTGATAGTGCAGGGTTTGAGG  
AAGACATTGATTTTCTGTTCAGCACTCAACCTGGTGATGAGACTGAGAGTGATGTCAACAATAT  
GAGCGCAGTTTTTGATAGTGTTGAGTGTGGAGACACAAATGGGGCTGGTGGAAGCATGATGCAT  
GTGGATAACAAGCAGAAGATAGTATCATTTGCTTCTTCACCATCATCTACAACCTACAGTTTCTT  
GTGACTATGCTCTAGATCTATGA
